# Supplementary material for: The cholesterol uptake regulator PCSK9 promotes and is a therapeutic target in APC/KRAS-mutant colorectal cancer
Source: PubMed Central journal article supplement (PMC9270407; doi:10.1038/s41467-022-31663-z), 2022-07-08
Supplement: 41467_2022_31663_MOESM1_ESM.pdf [file 41467_2022_31663_MOESM1_ESM.pdf]

**Supplementary Information for** The cholesterol uptake regulator PCSK9 promotes and is a therapeutic target in APC/KRAS-mutant colorectal cancer

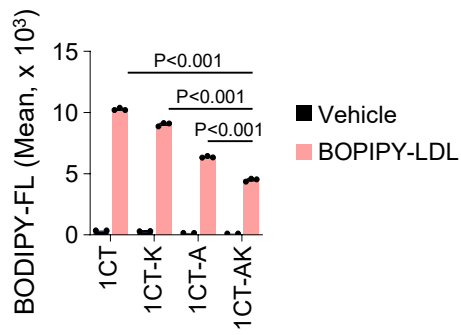

**Supplementary Figure S1.** Quantitative analysis of intracellular fluorescence after incubation with BODIPY-LDL (10 $\mu$ g/ml, 4h) by flow cytometry (n=3). Data shown are means of biological replicates;  $\pm$  S.E.M. Two-tailed Student's t-test.

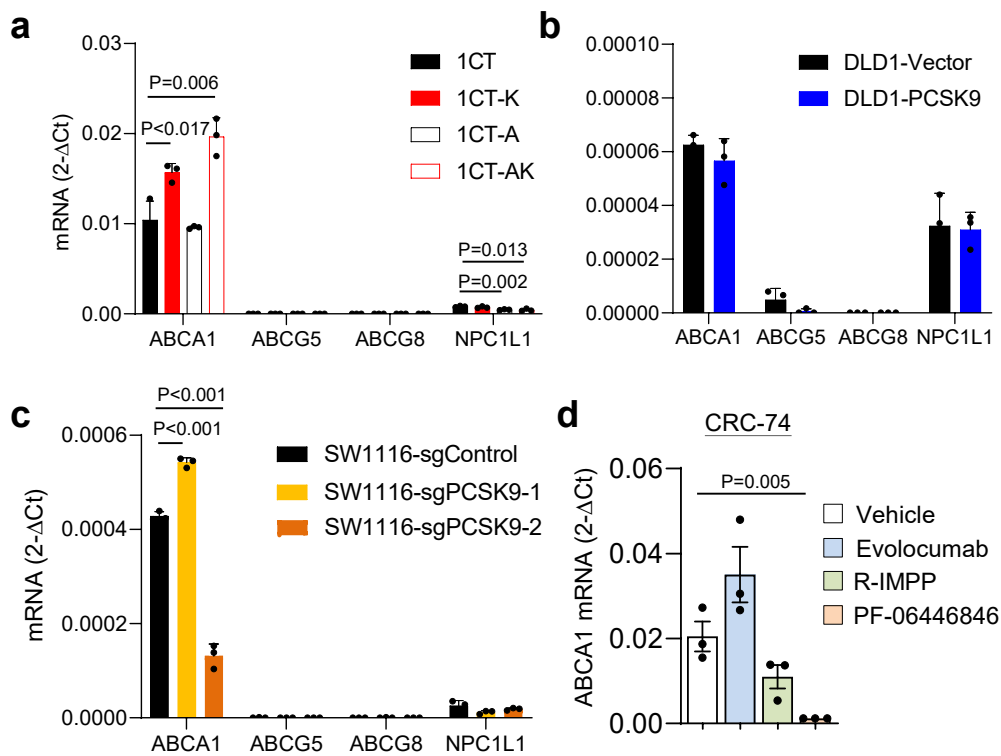

**Supplementary Figure S2.** qPCR of ABCA1, ABCG, ABCG8, and NPCL11 expression in **a** 1CT isogenic cells (n=3), **b** DLD1 cells with PCSK9 overexpression (n=3), **c** SW1116 cells with PCSK9 knockout (n=3) and **d** CRC-74 organoids (n=3). Data shown are means of biological replicates;  $\pm$  S.E.M (a, b, c, d). Two-tailed Student's t-test (a, b, c, d).

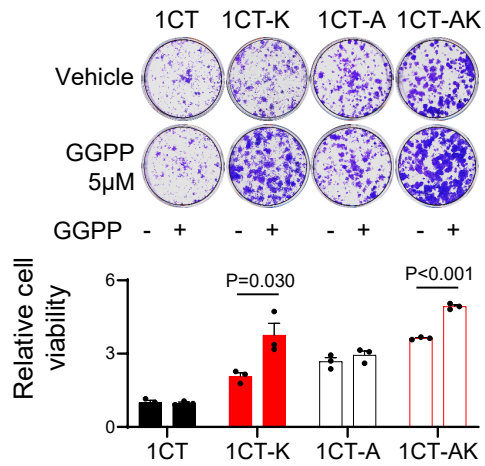

**Supplementary Figure S3.** Colony formation assays showed that GGPP promoted the cell growth of 1CT-K and 1CT-AK cells, but not in 1CT and 1CT-A cells (14 days, n=3). Data shown are means of biological replicates;  $\pm$  S.E.M. Two-tailed Student's t-test.

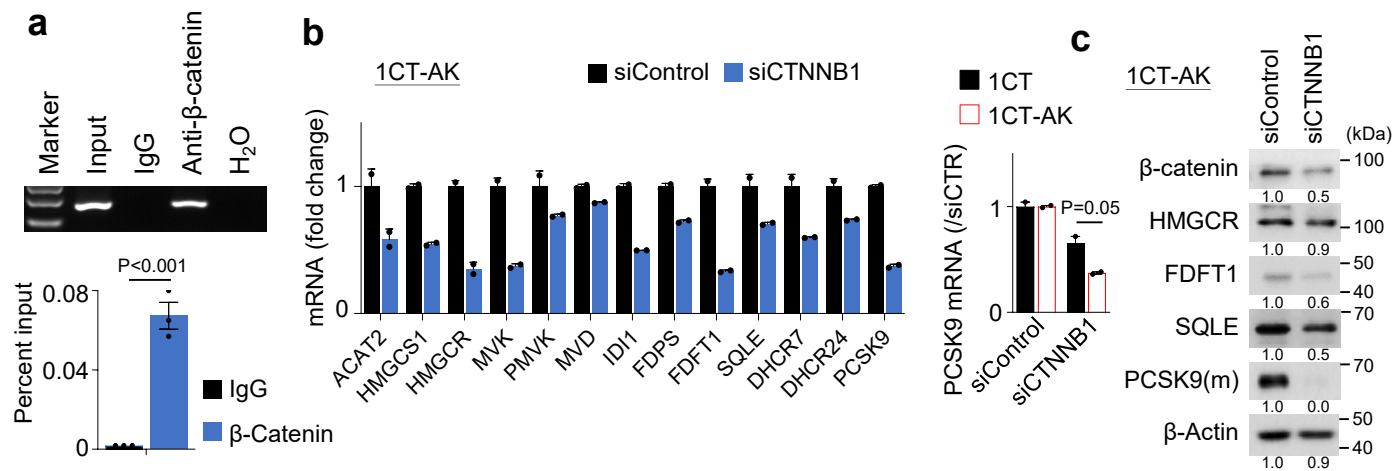

**Supplementary Figure S4.** β-catenin regulates PCSK9. **a** Chromatin immunoprecipitation-PCR (ChIP-PCR) and qPCR analysis of the binding of β-catenin to PCSK9 promoter (n=3). **b** β-catenin knockdown (72h) inhibited mRNA expression of PCSK9 and cholesterol biosynthesis genes in 1CT-AK cells (left) (n=2), with a more pronounced effect on PCSK9 mRNA in 1CT-AK cells compared to 1CT cells (right). Data are presented as means ± S.E.M. t-test (two-sided) **c** Western blot of effects of β-catenin knockdown in 1CT-AK cells. Data shown are means of biological replicates; ± S.E.M. (a, b). Two-tailed Student's t-test (a, b).

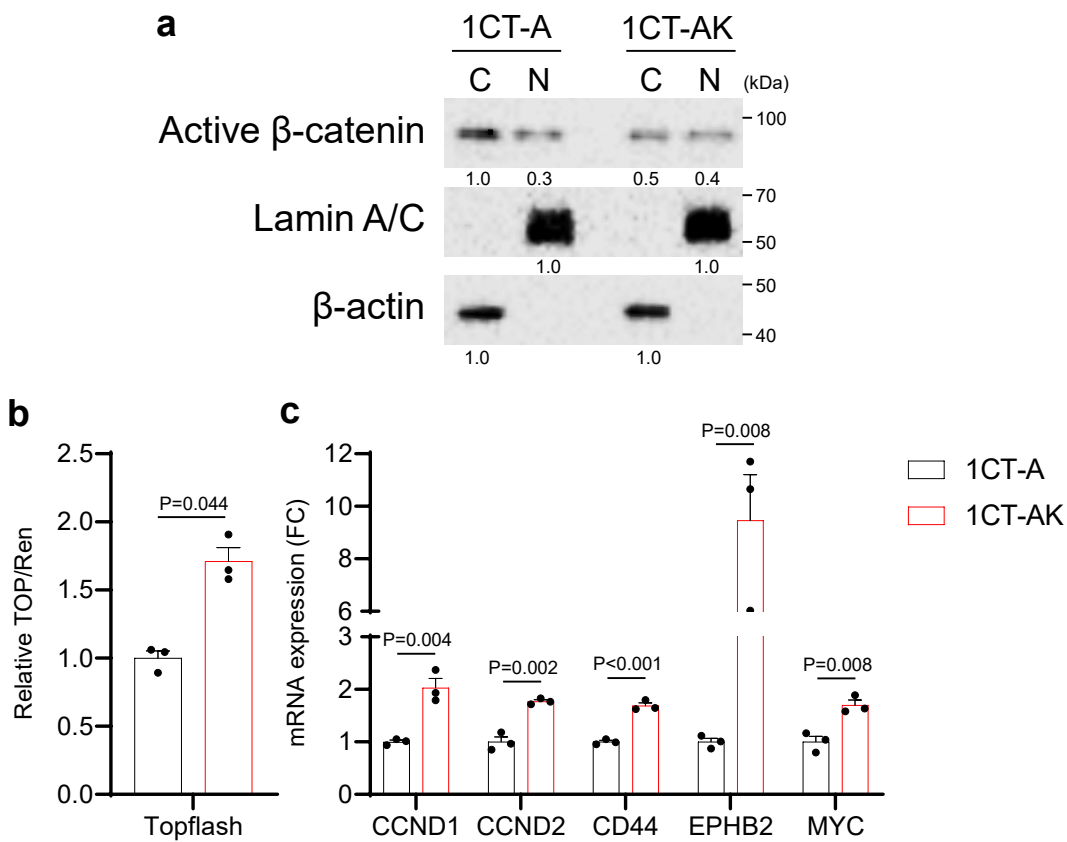

**Supplementary Figure S5.** Mutant KRAS promotes WNT/ $\beta$ -catenin signaling. **a** The localization of active  $\beta$ -catenin, **b** TOPflash activity (n=3), and **c** mRNA expression of  $\beta$ -catenin targets in 1CT-A and 1CT-AK cells (n=3). Data shown are means of biological replicates;  $\pm$  S.E.M. (**b**, **c**). Two-tailed Student's t-test (**b**, **c**).

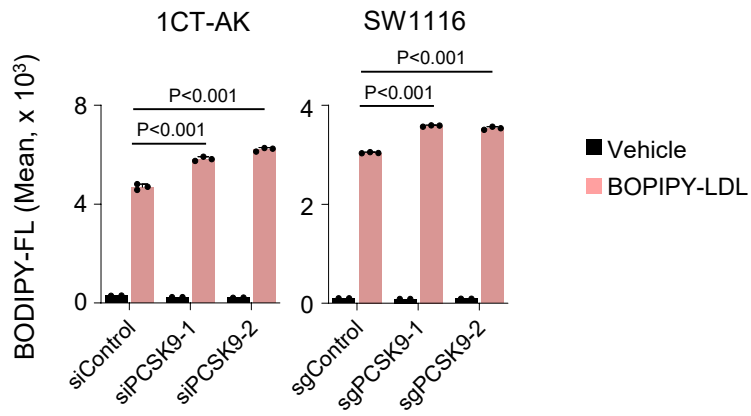

**Supplementary Figure S6.** Knockdown or knockout of PCSK9 induced the uptake of BODIPY-FL LDL (10 $\mu$ g/mL for 4h), as determined by flow cytometry (n=3). Data shown are means of biological replicates;  $\pm$  S.E.M. Two-tailed Student's t-test.

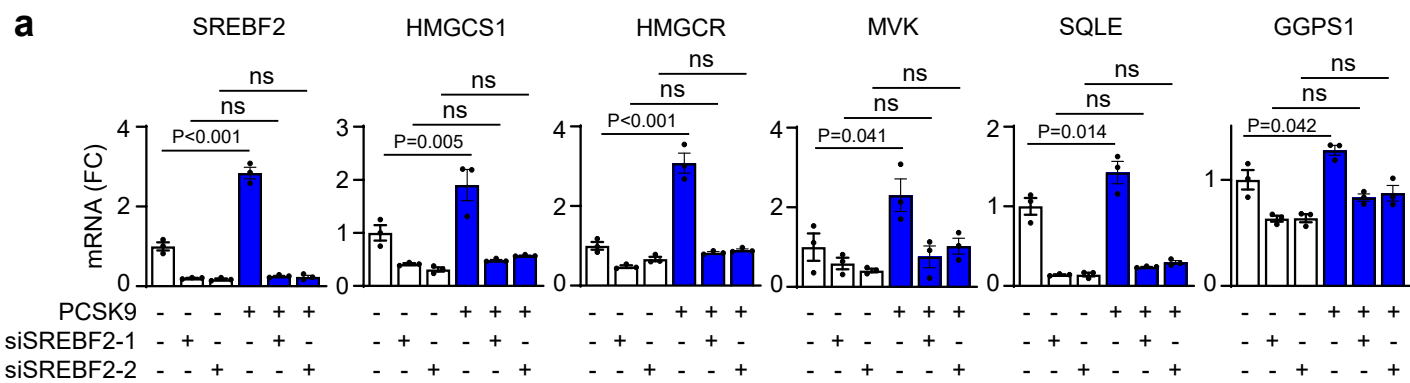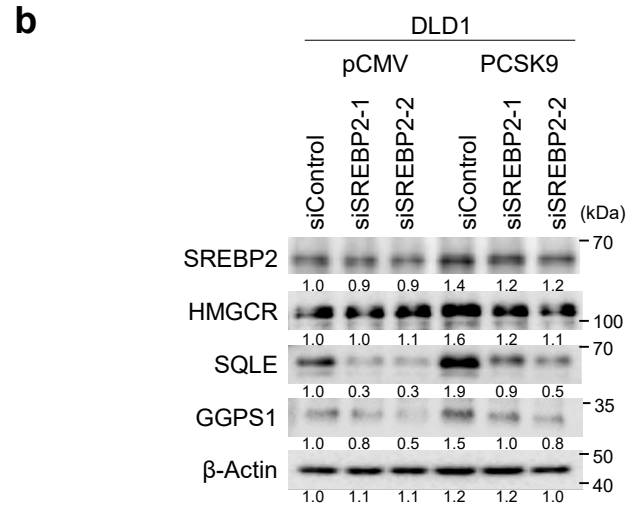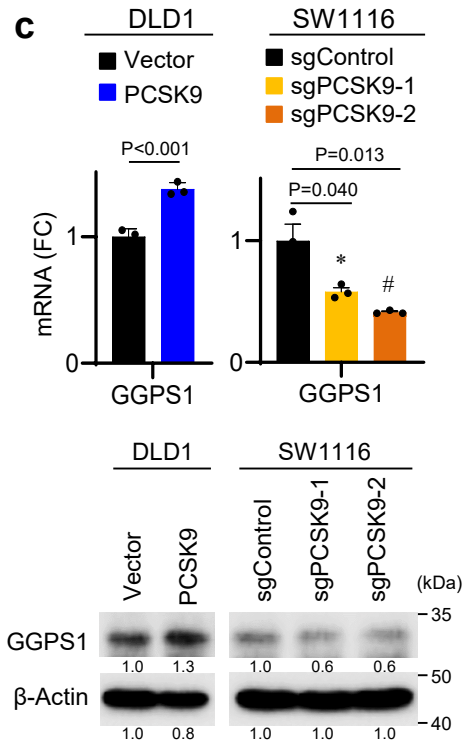

**Supplementary Figure S7. a** SREBP2 knockdown abrogated PCSK9 overexpression-mediated expression of cholesterol biosynthesis genes ( $n=3$ ) and **b** validation by western blot. **c** PCSK9 knockout reduced GGPS1, whereas PCSK9 overexpression exerted an opposite effect ( $n=3$ ). Data shown are means of biological replicates;  $\pm$  S.E.M. (**a, c**) Two-tailed one way ANOVA (**a**). Two-tailed Student's t-test (**c**).



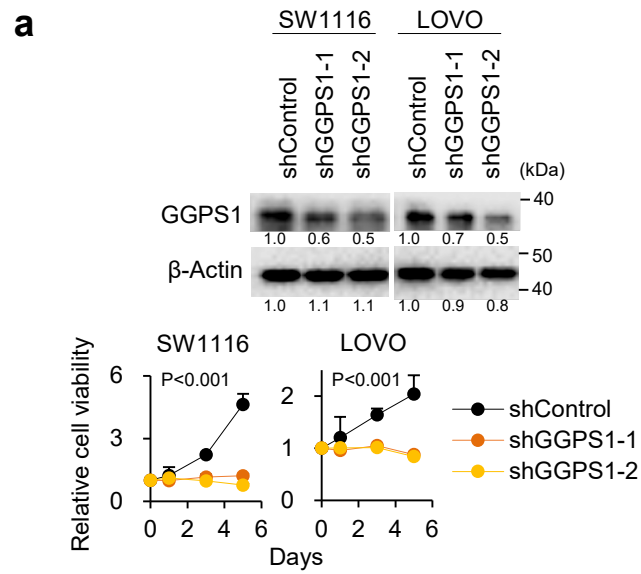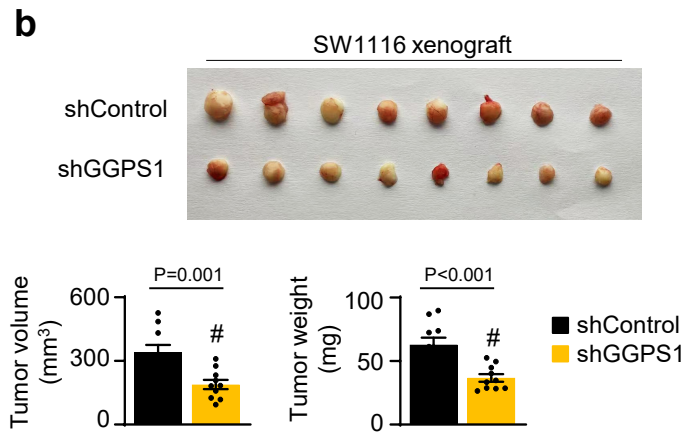

**Supplementary Figure S8.** GGPS1 knockdown inhibited **a** cell viability in vitro (n=6) and **b** growth of SW1116 xenografts in vivo (day 12, n=1 experiment, n=12 mice per group). Data shown are means of biological replicates;  $\pm$  S.E.M. (**a**, **b**). Two-tailed Student's t-test (**a**, **b**).

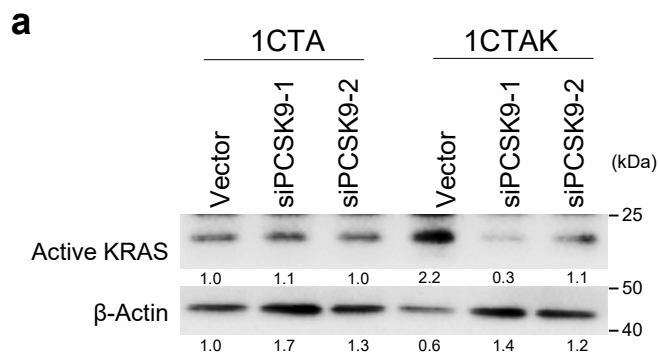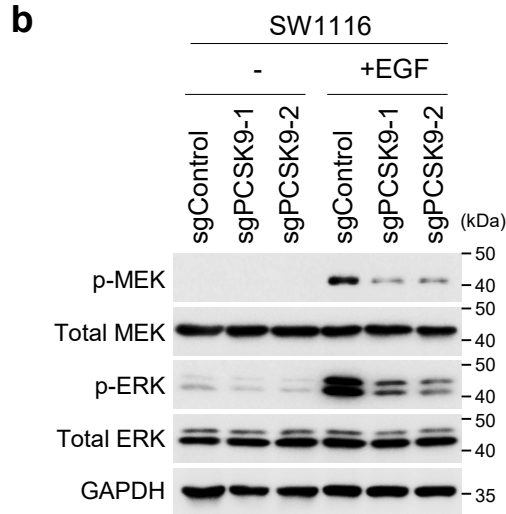

**Supplementary Figure S9. a** Active KRAS in isogenic 1CT cells with or without the knockdown of PCSK9. **b** SW1116-sgControl and SW1116-sgPCSK9 cells were serum-starved overnight, and then stimulated with EGF (10ng/mL) for 30min. sgPCSK9 suppressed EGF-mediated up-regulation of p-MEK and p-ERK.

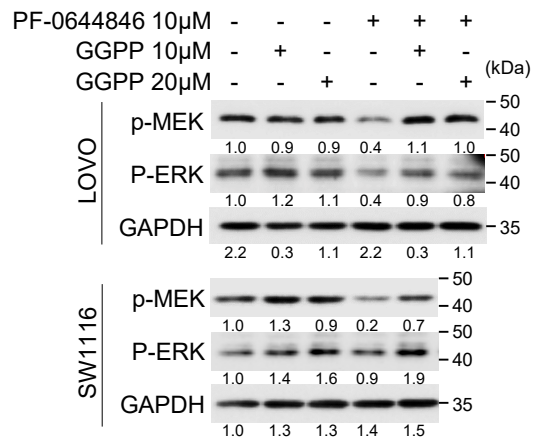

**Supplementary Figure S10.** GGPP restored p-MEK and p-ERK expression in LOVO and SW1116 cells treated with PF-0644846.

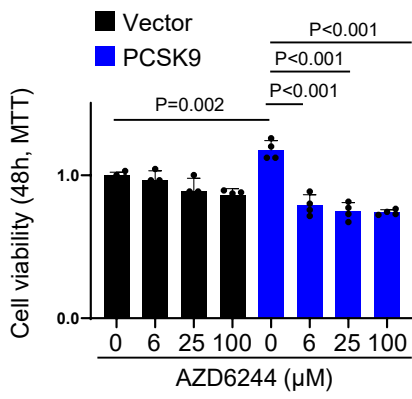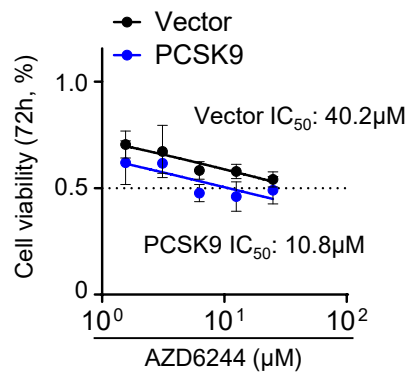

**Supplementary Figure S11.** MEK1/2 inhibitor AZD6244 abrogated the growth promoting effect of PCSK9 overexpression in DLD1 cells (n=4). Data shown are means of biological replicates; ± S.E.M. Two-tailed Student's t-test.

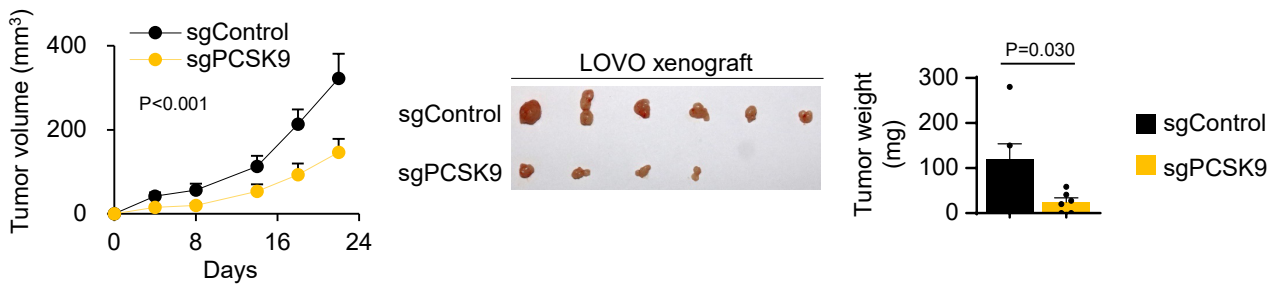

**Supplementary Figure S12.** PCSK9 knockout inhibited growth of LOVO xenografts in nude mice (n=1 experiment, n=6 mice per group). Data shown are means of biological replicates;  $\pm$  S.E.M. Two-tailed Student's t-test. Two-tailed two-way ANOVA (for growth curve).

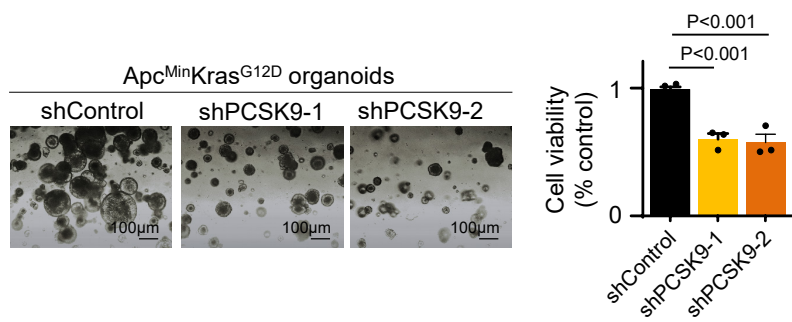

**Supplementary Figure S13.** Colon tumor organoids isolated from Apc<sup>Min/+</sup>Kras<sup>G12D/+</sup>Villin-Cre mice were transduced with lentiviral Pcsk9-shRNA and cell viability was assessed (n=3). Data shown are means of biological replicates; ± S.E.M. Two-tailed Student's t-test.

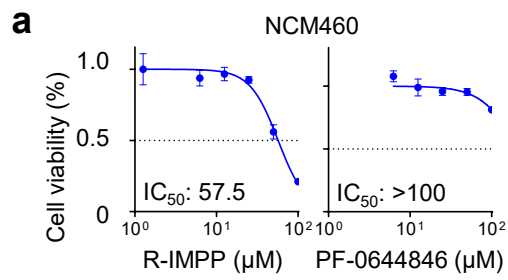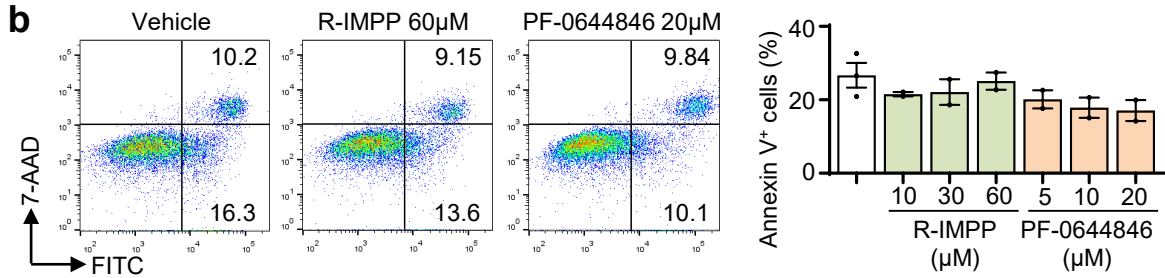

**Supplementary Figure S14.** Effect of PCSK9 inhibitors on NCM460 normal colon cell **a** growth and **b** apoptosis. Cell were treated for 72h and analyzed by MTT (n=3) or flow cytometry (n=2). Data shown are means of biological replicates;  $\pm$  S.E.M. (**a**, **b**). Two-tailed Student's t-test (**a**, **b**).

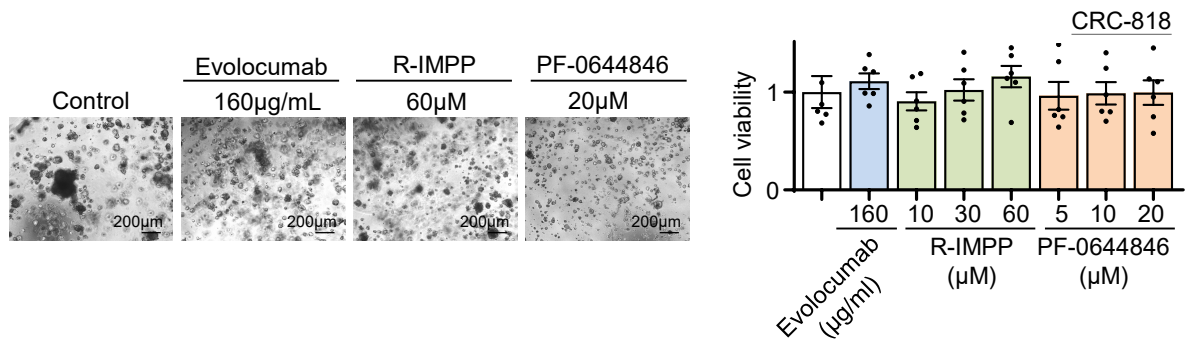

**Supplementary Figure S15.** Effect of PCSK9 inhibitors on CRC-818 organoids. Organoids were treated with these drugs for 5 days (n=6). Data shown are means of biological replicates;  $\pm$  S.E.M. Two-tailed Student's t-test.



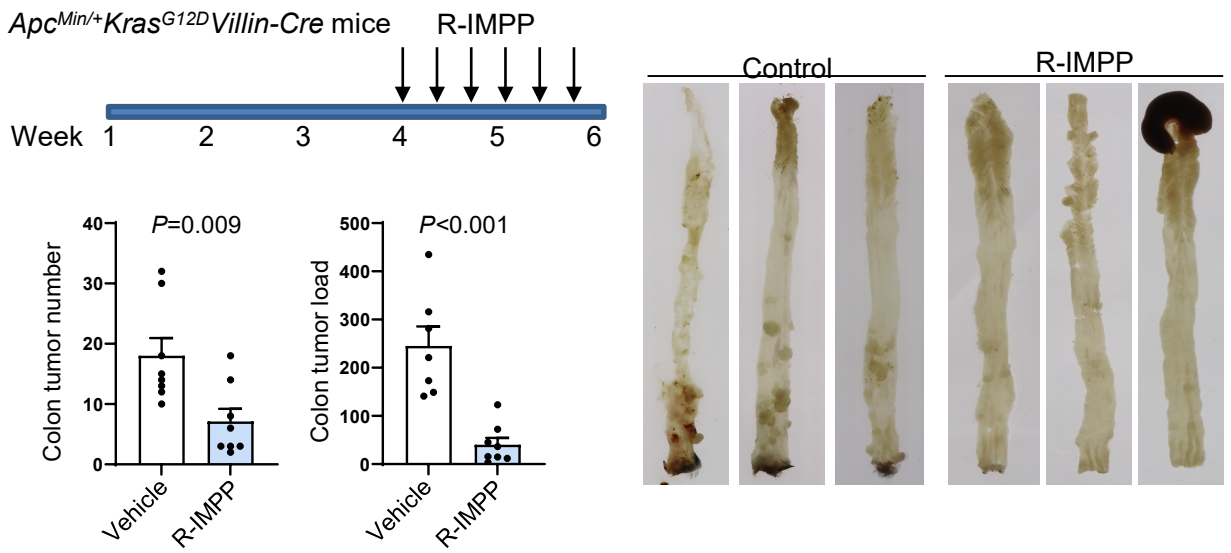

**Supplementary Figure S16.** Treatment of R-IMPP suppressed CRC in *Apc*<sup>Min/+</sup>*Kras*<sup>G12D/+</sup>*Villin-Cre* mice. Four weeks old mice were treated with vehicle or R-IMPP (50mg/kg, i.p., 3 times/week), and sacrificed at week 7 (n=1 experiment, n=7 for vehicle, n=8 for R-IMPP). Data shown are means of biological replicates;  $\pm$  S.E.M. t-test (two-sided).

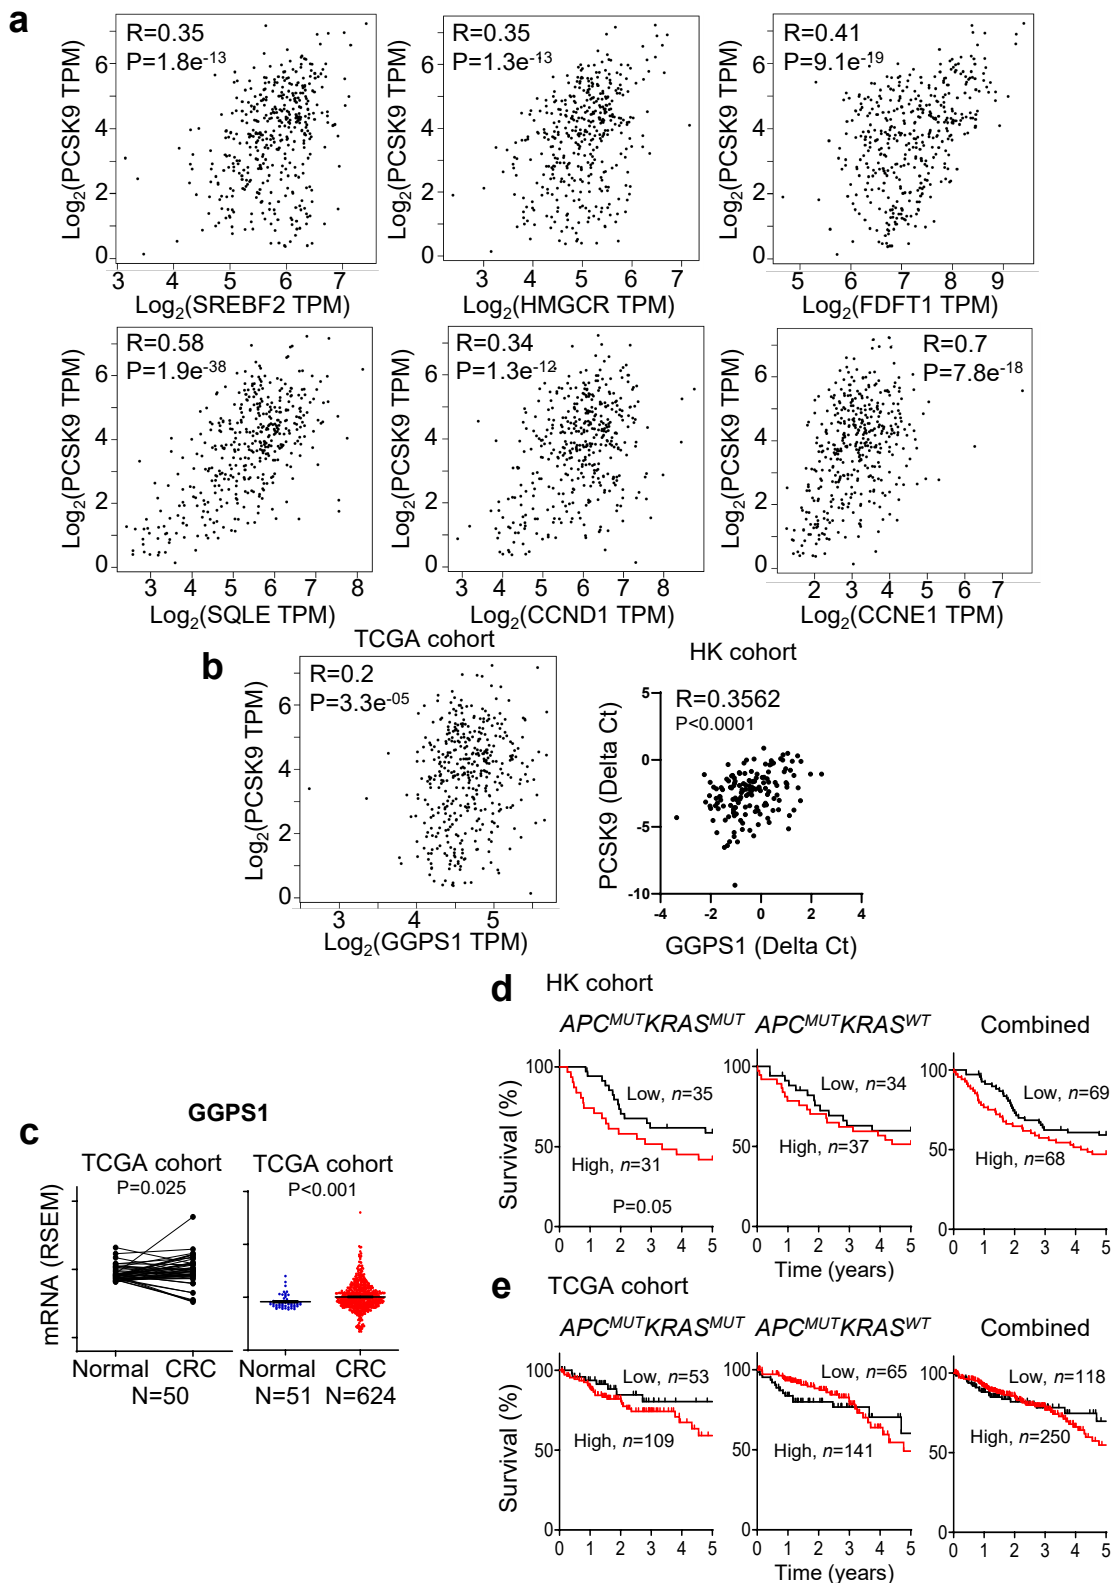

**Supplementary Figure S17.** **a** Correlation between PCSK9 mRNA and its downstream signaling in TCGA cohort. Spearman's rank-order correlation. **b** Correlation between PCSK9 and GGPS1 mRNA in TCGA and Hong Kong CRC cohort. Spearman's rank-order correlation. **c** GGPS1 mRNA is up-regulated in TCGA CRC dataset. t-test (two-tailed). **d** GGPS1 protein predicted poor survival of APC/KRAS-mutant CRC patients. Log rank test (two-tailed). **e** Association of GGPS1 mRNA expression with patient survival in TCGA cohort. Log rank test (two-tailed).

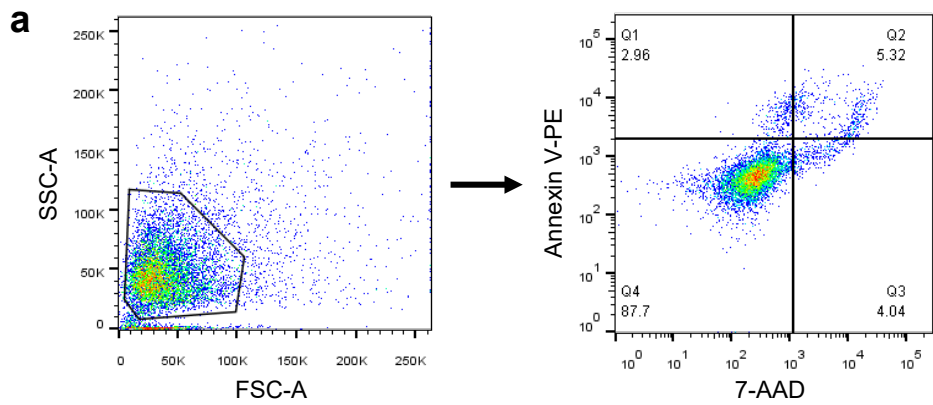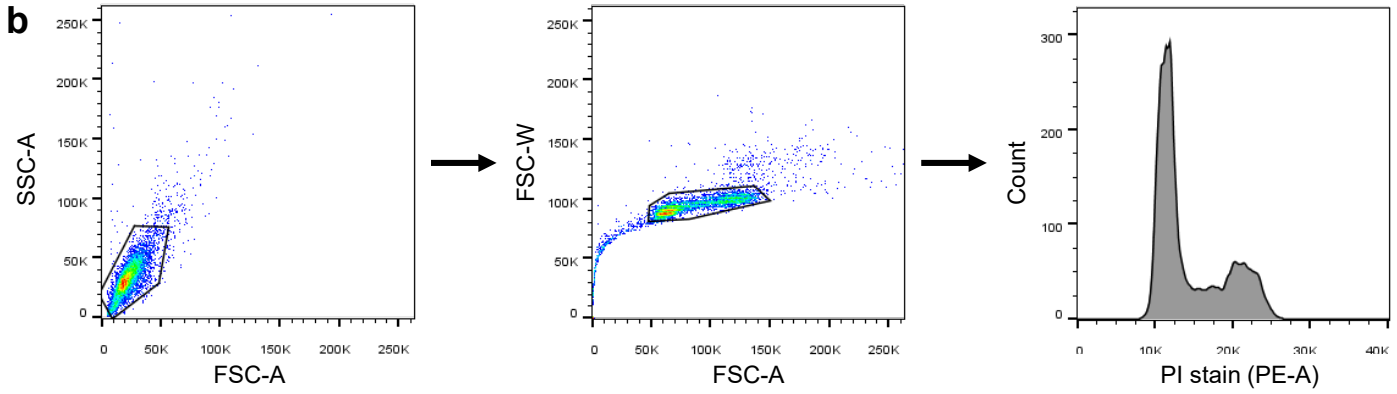

**Supplementary Figure S18.** Flow cytometry gating for **a** apoptosis and **b** cell cycle assays.

**Figure 5E**

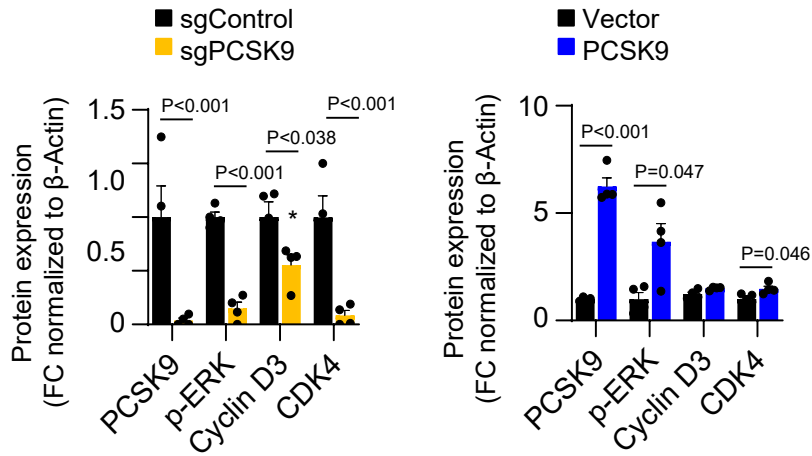

**Figure 6E**

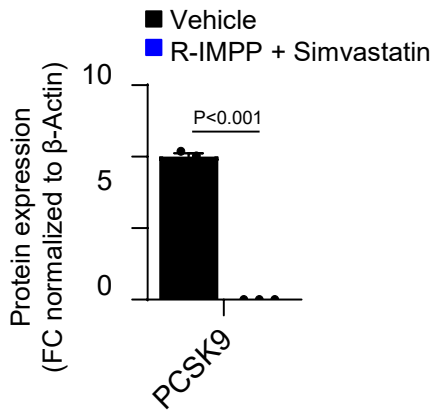

**Figure 6F**

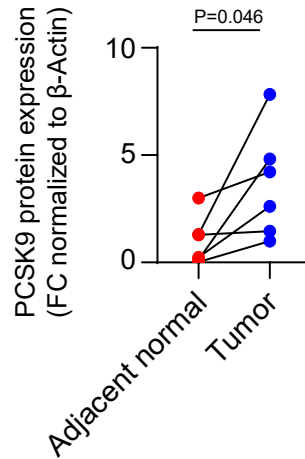

**Supplementary Figure S19.** Statistical analysis for Figure 5E, 6E and 6G. Data are presented as means  $\pm$  S.E.M. t-test (two-sided).

**Table S1.** In silico prediction indicates that binding sites for PCSK9 promoter.

| <b>Transcript</b> | <b>PROMO</b> | <b>JASPAR</b> |
|-------------------|--------------|---------------|
| PCSK9-001         | LEF1 (1)     | LEF1 (1)      |
|                   | TCF4 (1)     | TCF3 (4)      |
|                   |              | TCF4 (3)      |

**Table S2.** Clinicopathologic features of PCSK9 protein expression in CRC (TMA).  
Chi-square test (two-tailed).

| <b>Variables</b>         | <b>Low PCSK9<br/>expression (N=94)</b> | <b>High PCSK9<br/>expression (N=43)</b> | <b>P value</b> |
|--------------------------|----------------------------------------|-----------------------------------------|----------------|
| <b>Age, y, mean ± SD</b> | 67.2 ± 11.3                            | 68.9 ± 12.5                             | 0.492          |
| <b>Gender</b>            |                                        |                                         | 0.061          |
| Male                     | 61 (75.3)                              | 20 (24.7)                               |                |
| Female                   | 33 (58.9)                              | 23 (41.1)                               |                |
| <b>Location</b>          |                                        |                                         | 0.042          |
| Colon                    | 40 (59.7)                              | 27 (40.3)                               |                |
| Rectum                   | 54 (77.1)                              | 16 (22.9)                               |                |
| <b>KRAS status</b>       |                                        |                                         | 0.463          |
| Wildtype                 | 51 (71.8)                              | 20 (28.2)                               |                |
| Mutant                   | 43 (65.2)                              | 23 (34.8)                               |                |
| <b>TNM stage</b>         |                                        |                                         | 0.177          |
| I                        | 8 (72.7)                               | 3 (27.2)                                |                |
| II                       | 34 (75.6)                              | 11 (24.4)                               |                |
| III                      | 30 (73.2)                              | 11 (26.8)                               |                |
| IV                       | 22 (55.0)                              | 18 (45.0)                               |                |

**Table S3.** Clinicopathologic features of PCSK9 protein expression in CRC (TCGA).  
Chi-square test (two-tailed).

| <b>Variables</b>         | <b>Low PCSK9<br/>expression (N=174)</b> | <b>High PCSK9<br/>expression (N=194)</b> | <b>P value</b> |
|--------------------------|-----------------------------------------|------------------------------------------|----------------|
| <b>Age, y, mean ± SD</b> | 66.8 ± 11.1                             | 65.35 ± 12.8                             | 0.416          |
| <b>Gender</b>            |                                         |                                          | 0.472          |
| Male                     | 98 (49.0)                               | 102 (51.0)                               |                |
| Female                   | 76 (45.2)                               | 92 (54.8)                                |                |
| <b>Location</b>          |                                         |                                          | 0.958          |
| Colon                    | 126 (47.4)                              | 140 (52.6)                               |                |
| Rectum                   | 48 (47.1)                               | 54 (52.9)                                |                |
| <b>KRAS status</b>       |                                         |                                          | 0.585          |
| Wildtype                 | 100 (48.5)                              | 106 (51.5)                               |                |
| Mutant                   | 74 (45.7)                               | 88 (54.3)                                |                |
| <b>TNM stage</b>         |                                         |                                          | 0.661          |
| I                        | 34 (48.6)                               | 36 (51.4)                                |                |
| II                       | 63 (51.2)                               | 60 (48.8)                                |                |
| III                      | 51 (43.6)                               | 66 (56.4)                                |                |
| IV                       | 26 (44.8)                               | 32 (55.2)                                |                |

**Table S4.** Cox-regression analysis of potential survival predictor for patients with CRC (TMA). Cox-regression analysis (two-tailed).

| Variables            | Univariate Cox regression analysis |         | Multivariate Cox regression analysis |         |
|----------------------|------------------------------------|---------|--------------------------------------|---------|
|                      | HR (95% C.I.)                      | P-Value | HR (95% C.I.)                        | P-Value |
| <b>Age</b>           |                                    | 0.066   |                                      | 0.034   |
| ≤65                  | 1                                  |         | 1                                    |         |
| >65                  | 1.93 (0.957-3.89)                  |         | 2.23 (1.08-4.57)                     |         |
| <b>Gender</b>        |                                    | 0.970   |                                      | 0.059   |
| Male                 | 1                                  |         | 1                                    |         |
| Female               | 0.987 (0.49-1.98)                  |         | 0.436 (0.18-1.03)                    |         |
| <b>TNM stage</b>     |                                    | 0.000   |                                      | 0.000   |
| Early (I & II)       | 1                                  |         | 1                                    |         |
| Late (III & IV)      | 8.15 (3.32-20.03)                  |         | 9.90 (3.80-25.79)                    |         |
| <b>PCSK9 protein</b> |                                    | 0.003   |                                      | 0.007   |
| Low                  | 1                                  |         | 1                                    |         |
| High                 | 2.99 (1.49-6.02)                   |         | 3.21 (1.37-7.51)                     |         |



**Table S5.** Cox-regression analysis of potential survival predictor for patients with CRC (TCGA). Cox-regression analysis (two-tailed).

| Variables            | Univariate Cox regression analysis |         | Multivariate Cox regression analysis |         |
|----------------------|------------------------------------|---------|--------------------------------------|---------|
|                      | HR (95% C.I.)                      | P-Value | HR (95% C.I.)                        | P-Value |
| <b>Age</b>           |                                    | 0.063   |                                      | 0.200   |
| ≤65                  | 1                                  |         | 1                                    |         |
| >65                  | 2.21 (0.96-5.08)                   |         | 1.80 (0.73-4.44)                     |         |
| <b>Gender</b>        |                                    | 0.471   |                                      | 0.718   |
| Male                 | 1                                  |         | 1                                    |         |
| Female               | 0.78 (0.39-1.54)                   |         | 0.88 (0.43-1.79)                     |         |
| <b>TNM stage</b>     |                                    | 0.000   |                                      | 0.000   |
| Early (I & II)       | 1                                  |         | 1                                    |         |
| Late (III & IV)      | 4.18 (1.98-8.79)                   |         | 4.38 (2.08-9.23)                     |         |
| <b>PCSK9 protein</b> |                                    | 0.047   |                                      | 0.022   |
| Low                  | 1                                  |         | 1                                    |         |
| High                 | 2.10 (1.01-4.36)                   |         | 2.29 (1.10-4.77)                     |         |

**Table S6.** List of antibodies used in this study

| <b>Antibody</b>                         | <b>Company</b>             | <b>Catalogue number</b> |
|-----------------------------------------|----------------------------|-------------------------|
| $\beta$ -Catenin                        | Santa Cruz Biotechnology   | sc-7199 (1:500)         |
| Active $\beta$ -Catenin                 | Cell Signalling Technology | 8814 (1:1000)           |
| $\beta$ -Catenin (ChIP grade)           | Abcam                      | ab227499 (1:1000)       |
| CDK4                                    | Cell Signalling Technology | 12790 (1:1000)          |
| Cleaved PARP                            | Cell Signalling Technology | 5625 (1:1000)           |
| Cyclin D1                               | Cell Signalling Technology | 2922S (1:1000)          |
| Cyclin D3                               | Cell Signalling Technology | 2936S (1:1000)          |
| FDFT1                                   | Abcam                      | ab195046 (1:1000)       |
| GGPS1                                   | Abcam                      | ab167168 (1:1000)       |
| HMGCR                                   | Abcam                      | ab174830 (1:1000)       |
| KRAS                                    | Abcam                      | ab180772 (1:1000)       |
| Lamin AC                                | Cell Signalling Technology | 4777 (1:1000)           |
| LDLR                                    | Abcam                      | ab52818 (1:500)         |
| MYC                                     | Abcam                      | ab32072 (1:1000)        |
| Na <sup>+</sup> /K <sup>+</sup> -ATPase | Abcam                      | ab76020 (1:1000)        |
| p-ERK1/2                                | Cell Signalling Technology | 4377 (1:1000)           |
| p-MEK1/2                                | Cell Signalling Technology | 9154 (1:1000)           |
| p-p90RSK                                | Cell Signalling Technology | 11989 (1:1000)          |
| p27kip1                                 | Cell Signalling Technology | 3686 (1:1000)           |
| PCSK9                                   | Abcam                      | ab181142 (1:1000)       |
| SQLE                                    | Abcam                      | ab76896 (1:1000)        |
| SREBP2                                  | R&D Systems                | AF7119 (1:200)          |
| Total ERK1/2                            | Abcam                      | ab184699 (1:1000)       |
| Total MEK1/2                            | Abcam                      | ab178876 (1:1000)       |
| $\beta$ -Actin (13E5)                   | Cell Signalling Technology | 4970 (1:1000)           |
| GAPDH (FL-335)                          | Santa Cruz Biotechnology   | sc-25778 (1:500)        |

**Table S7: Primers used in this study**

| <b>Primer</b> | <b>Sequence</b>                                                      | <b>Application</b> |
|---------------|----------------------------------------------------------------------|--------------------|
| ABCA1 mRNA    | F: 5'-GAAGTACATCAGAACATGGGC-3'<br>R: 5'-GATCAAAGCCATGGCTGTAG-3'      | qPCR               |
| ABCG5 mRNA    | F: 5'-TCCTGAGGAGAGTGACAAGAAAC-3'<br>R: 5'-ACGGGAAACAGATTCACAGC-3'    | qPCR               |
| ABCG8 mRNA    | F: 5'-GGAACCCAGGAATCCTTATTCTC-3'<br>R: 5'-GGTCAGGTCCACATAGAAGTCAG-3' | qPCR               |
| DHCR7 mRNA    | F: 5'-CGCAGGACTTTAGCCGGT-3'<br>R: 5'-TGTCATTGGTGACGCCATCT-3'         | qPCR               |
| DHCR24 mRNA   | F: 5'-TGAAGACAAACCGAGAGGGC-3'<br>R: 5'-CAGCCAAAGAGGTAGCGGAA-3'       | qPCR               |
| FDFT1 mRNA    | F: 5'-CCACCCCGAAGAGTTCTACAA-3'<br>R: 5'-TGCGACTGGTCTGATTGAGATA-3'    | qPCR               |
| FDPS mRNA     | F: 5'-CAGCTTTCTACTCCTTCTACCTTCC-3'<br>R: 5'-GCTCCTTCTCGCCATCAAT-3'   | qPCR               |
| GGPS1 mRNA    | F: 5'-CCAGGTAAACAAGTGAGAACCAA-3'<br>R: 5'-CGTCGGAGTTTTGAGTTGTCT-3'   | qPCR               |
| HMGCR mRNA    | F: 5'-TGATTGACCTTTCAGAGCAAG-3'<br>R: 5'-CTAAAATTGCCATTCCACGAGC-3'    | qPCR               |
| HMGCS1 mRNA   | F: 5'-CATTAGACCGCTGCTATTCTGTC-3'<br>R: 5'-TTCAGCAACATCCGAGCTAGA-3'   | qPCR               |
| IDI1 mRNA     | F: 5'-TGGATAAAACCCCTGTGGTG-3'<br>R: 5'-CAACATCCGGCATAACTGTG-3'       | qPCR               |
| LDLR mRNA     | F: 5'-TACAAGTGGGTCTGCGATGG-3'<br>R: 5'-TGAAGTCCCCGGATTTGCAG-3'       | qPCR               |
| MVD mRNA      | F: 5'-GTAAGTGGCTGTGGAGCTGG-3'<br>R: 5'-GGAGTTGATGGGCAGAACCA-3'       | qPCR               |
| MVK mRNA      | F: 5'-CTCTGATTGGCTGGCCTGAA-3'<br>R: 5'-CCAACCTCCACAACCCAGAG-3'       | qPCR               |
| NPC1L1 mRNA   | F: 5'-TATCTTCCCTGGTTCCTGAACGAC-3'<br>R: 5'-CCGCAGAGCTTCTGTGTAATCC-3' | qPCR               |
| PCSK9 mRNA    | F: 5'-GACGATGCCTGCCTCTACTC-3'<br>R: 5'-CCAATGATGTCTCCCTGG-3'         | qPCR               |
| PMVK mRNA     | F: 5'-GCTGATGTCTGTGCTGTCCT-3'<br>R: 5'-GAAAGGCCTCCTTGTAGGTG-3'       | qPCR               |

|             |                                                                      |          |
|-------------|----------------------------------------------------------------------|----------|
| SQLE mRNA   | F: 5'-TGACAATTCTCATCTGAGGTCCA-3'<br>R: 5'-CAGGGATACCCTTTAGCAGTTTT-3' | qPCR     |
| ACTIN mRNA  | F: 5'-AGAGCTACGAGCTGCCTGAC-3'<br>R: 5'-AGCACTGTGTTGGCGTACAG-3'       | qPCR     |
| Acat2 mRNA  | F: 5'-CCCGTGGTCATCGTCTCAG-3'<br>R: 5'-GGACAGGGCACCATTGAAGG-3'        | qPCR     |
| Dhcr7 mRNA  | F: 5'-AGGCTGGATCTCAAGGACAAT-3'<br>R: 5'-GCCAGACTAGCATGGCCTG-3'       | qPCR     |
| Dhcr24 mRNA | F: 5'-CGCTGCGAGTCGGAAAGTA-3'<br>R: 5'-GTCACCTGACCCATAGACACC-3'       | qPCR     |
| Fdft1 mRNA  | F: 5'-ATGGAGTTCGTCAAGTGTCTAGG-3'<br>R: 5'-CGTGCCGTATGTCCCATC-3'      | qPCR     |
| Fdps mRNA   | F: 5'-ATGCCATCAACGACGCTCTG-3'<br>R: 5'-CCGATCTCTGTCTGATAGGAACT-3'    | qPCR     |
| Hmgcr mRNA  | F: 5'-AGCTTGCCCGAATTGTATGTG-3'<br>R: 5'-TCTGTTGTGAACCATGTGACTTC-3'   | qPCR     |
| Hmgcs1 mRNA | F: 5'-AACTGGTGCAGAAATCTCTAGC-3'<br>R: 5'-GGTTGAATAGCTCAGAACTAGCC-3'  | qPCR     |
| Idi1 mRNA   | F: 5'-ACCAGCCATCTTGATGAAAAACA-3'<br>R: 5'-CAGCAACTATTGGTGAAACAACC-3' | qPCR     |
| Mvd mRNA    | F: 5'-ATGGCCTCAGAAAAGCCTCAG-3'<br>R: 5'-TGGTCGTTTTTAGCTGGTCCT-3'     | qPCR     |
| Mvk mRNA    | F: 5'-AGCGTCAATTTACCCAACATCG-3'<br>R: 5'-GAGACATCACCTTGCTCAAGAAA-3'  | qPCR     |
| Pcsk9 mRNA  | F: 5'-GAGACCCAGAGGCTACAGATT-3'<br>R: 5'-AATGTACTCCACATGGGGCAA-3'     | qPCR     |
| PCSK9 ChIP  | F: 5'-CACTGTCTTTGTGCACTGGC-3'<br>R: 5'-TGCTCTTTCTGGAAGGGCTG-3'       | ChIP-PCR |
